# Supplementary material for: Implications of Stemness Features in 1059 Hepatocellular Carcinoma Patients from Five Cohorts: Prognosis, Treatment Response, and Identification of Potential Compounds
Source: MDPI journal article supplement (doi:10.3390/cancers14030563), 2022-01-23
Supplement: s1 [file s1]

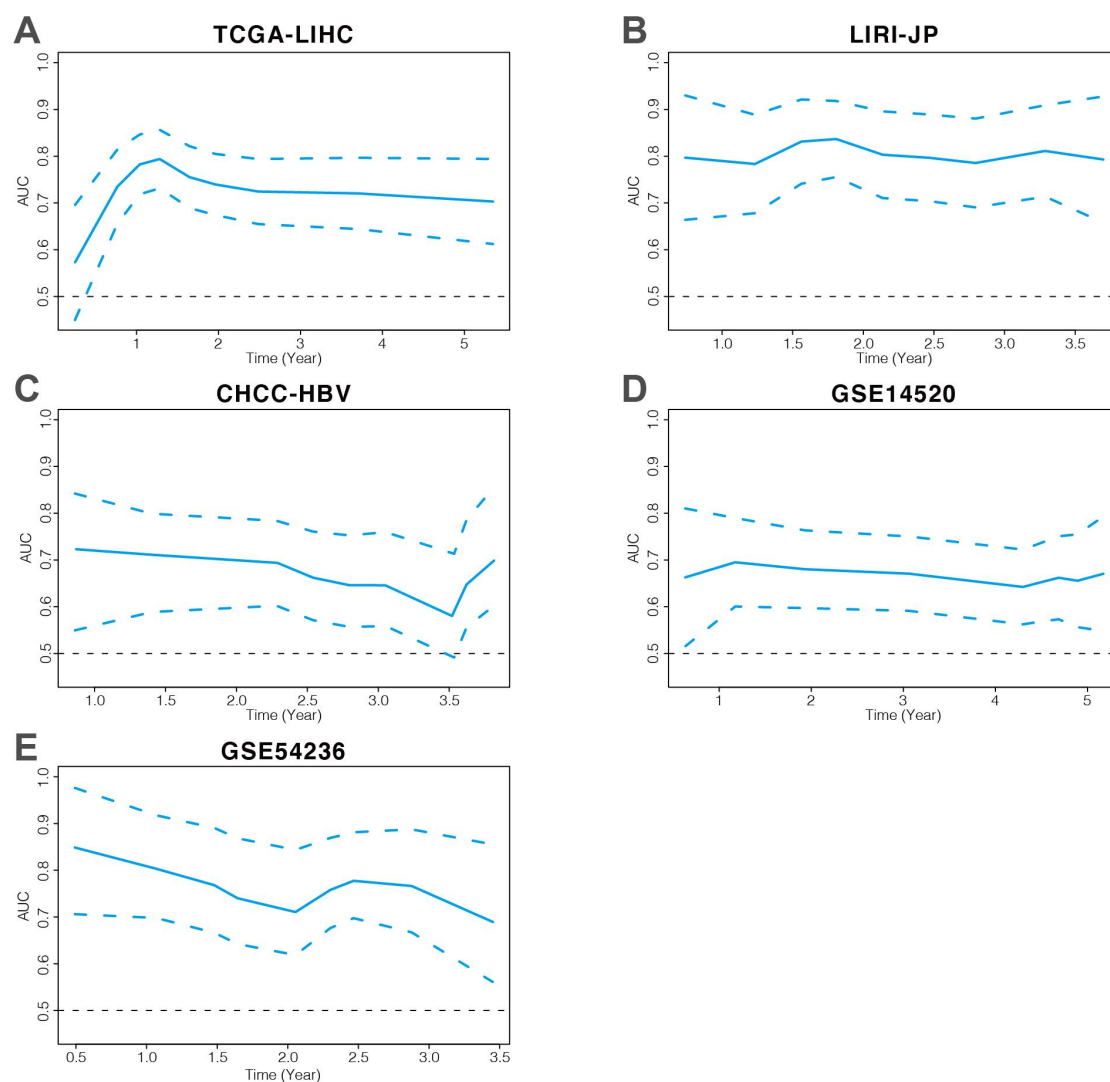

Figure S1. Time-dependent receiver operating characteristic (ROC) curves demonstrate the clinical significance of HSRM in predicting the OS in five HCC cohort.

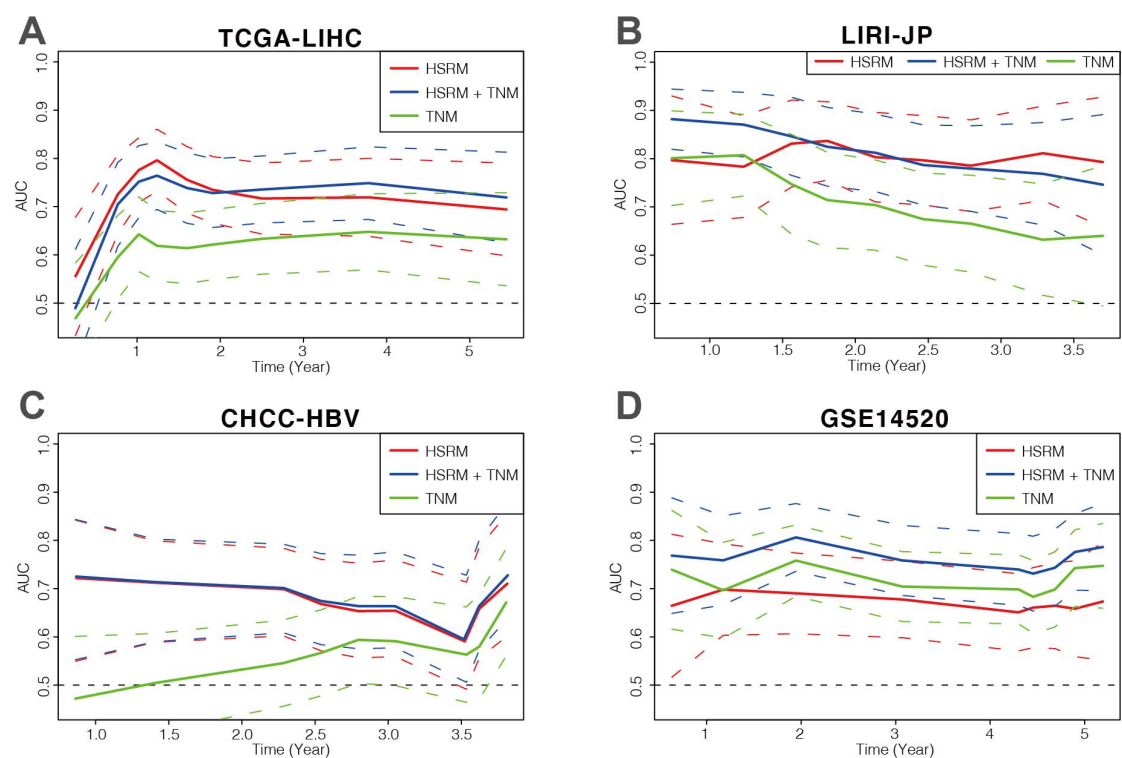

Figure S2. Time-dependent receiver operating characteristic (ROC) curves to compare the prognostic accuracy of HSRM with TNM stage in predicting the OS in four HCC cohorts. TNM stage were transformed into numeric codes before they were entered into the COX regression analysis. Numeric codes are as follows: stage I = 1, stage II = 2, stage III = 3, stage IV = 4 [1].

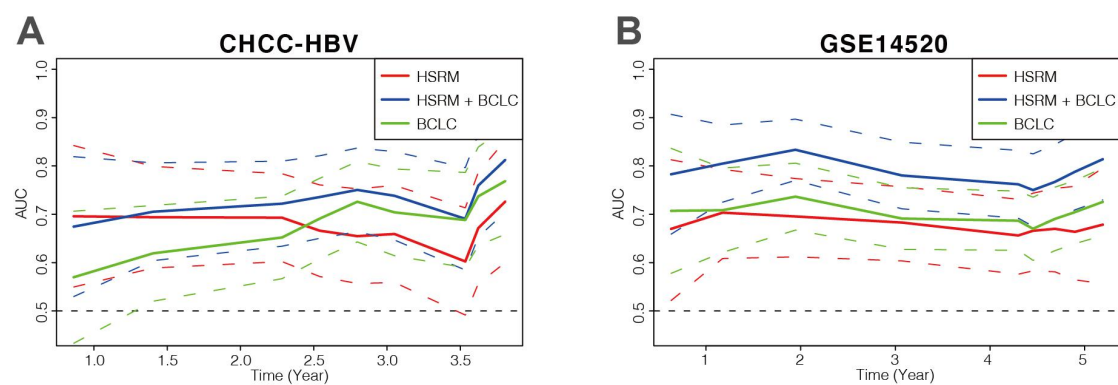

Figure S3. Time-dependent receiver operating characteristic (ROC) curves to compare the prognostic accuracy of HSRM with Barcelona Clinic Liver Cancer (BCLC) staging system in predicting the OS in two HCC cohorts. BCLC stage were transformed into numeric codes before they were entered into the COX regression analysis. Numeric codes are as follows: stage 0 = 0, stage 1 = 1, stage 2 = 2, stage 3 = 3 [1].



Table S1. Summary of the main findings in current research.

| method                                                                                                                                       | datasets                                                     | result                                                                                                                                                                                                                                                                                                     |
|----------------------------------------------------------------------------------------------------------------------------------------------|--------------------------------------------------------------|------------------------------------------------------------------------------------------------------------------------------------------------------------------------------------------------------------------------------------------------------------------------------------------------------------|
| <i>Data preprocessing and mRNAsi calculation</i>                                                                                             |                                                              |                                                                                                                                                                                                                                                                                                            |
| OCLR algorithm                                                                                                                               | TCGA-LIHC,<br>LIRI-JP,<br>CHCC-HBV,<br>GSE14520,<br>GSE54236 | mRNAsi of 1,059 HCC patients                                                                                                                                                                                                                                                                               |
| <i>Association of transcriptional stemness index with clinical and molecular features</i>                                                    |                                                              |                                                                                                                                                                                                                                                                                                            |
| Multivariate Cox regression analysis                                                                                                         | TCGA-LIHC                                                    | mRNAsi might be an independent prognostic factor for HCC patients                                                                                                                                                                                                                                          |
| Spearman correlation analysis<br>( $ R  > 0.5$ )                                                                                             | TCGA-LIHC                                                    | 626 mRNAsi-related genes                                                                                                                                                                                                                                                                                   |
| <i>Training and validation of HSRM of HCC stemness in five HCC cohorts</i>                                                                   |                                                              |                                                                                                                                                                                                                                                                                                            |
| LASSO COX analysis,<br>K-M plots,<br>Time-dependent ROC curve analysis                                                                       | TCGA-LIHC                                                    | HSRM was developed from 626 mRNAsi-related genes to predict HCC prognosis                                                                                                                                                                                                                                  |
| K-M plots,<br>Time-dependent ROC curve analysis                                                                                              | LIRI-JP,<br>CHCC-HBV,<br>GSE14520,<br>GSE54236               | HSRM was validated by four independent cohorts                                                                                                                                                                                                                                                             |
| K-M plots                                                                                                                                    | GSE54236                                                     | HSRM was significantly associated tumor rapid growth in HCC patients                                                                                                                                                                                                                                       |
| ROC curve analysis                                                                                                                           | GSE104580                                                    | HSRM was significantly associated with TACE treatment response in HCC patients                                                                                                                                                                                                                             |
| <i>Consensus clustering divided HCC patients into two stemness subtypes with distinct functional annotation and somatic mutation pattern</i> |                                                              |                                                                                                                                                                                                                                                                                                            |
| Unsupervised consensus clustering,<br>GSVA analysis                                                                                          | TCGA-LIHC,<br>LIRI-JP,<br>CHCC-HBV,<br>GSE14520,<br>GSE54236 | ① 626 mRNAsi-related genes were used to classify 1059 patients into 2 stemness subtypes with distinct mRNAsi level (higher mRNAsi in subtype I);<br>② Stemness subtype I was enriched with cell cycle, DNA replication pathways, whereas several liver-specific metabolic pathways were inhibited in these |

samples.

|                                                                                        |                                                              |                                                                                                                                                                                                                                                                                                                                                                                                                     |
|----------------------------------------------------------------------------------------|--------------------------------------------------------------|---------------------------------------------------------------------------------------------------------------------------------------------------------------------------------------------------------------------------------------------------------------------------------------------------------------------------------------------------------------------------------------------------------------------|
| Somatic Mutation Analysis                                                              | TCGA-LIHC,<br>LIRI-JP                                        | Stemness subtype I was associated with more frequent mutations of TP53 and RB1                                                                                                                                                                                                                                                                                                                                      |
| <i>Identification of potential compounds targeting transcriptional stemness of HCC</i> |                                                              |                                                                                                                                                                                                                                                                                                                                                                                                                     |
| Enrichment analysis,<br>GSEA,<br>cMAP analysis                                         | TCGA-LIHC,<br>LIRI-JP,<br>CHCC-HBV,<br>GSE14520,<br>GSE54236 | <p>① Median value of mRNAsi was used to classify 1059 HCC patients into high mRNAsi and low mRNAsi group;</p> <p>② Cell cycle and DNA replication pathways associated with higher mRNAsi, whereas several liver-specific metabolic pathways associated with lower mRNAsi;</p> <p>③ Topoisomerase, cyclin-dependent kinase and histone deacetylase were identified as potential targets to inhibit HCC stemness.</p> |
| <i>In vitro</i> assay                                                                  | -                                                            | <p>① Aminopurvalanol-a and NCH-51 were selected to conduct <i>in vitro</i> assay;</p> <p>② Aminopurvalanol-a and NCH-51 effectively suppressed oncosphere formation and impaired viability of HCC cell lines.</p>                                                                                                                                                                                                   |

---

Table S2. Stemness index (mRNAsi) of 1059 HCC patients from five cohorts.

| sample id        | mRNAsi      | cohort    |
|------------------|-------------|-----------|
| TCGA.CC.A7II.01A | 1           | TCGA-LIHC |
| GSM363129        | 0.925734669 | GSE14520  |
| TCGA.G3.A7M9.01A | 0.901653432 | TCGA-LIHC |
| T965             | 0.89895248  | CHCC-HBV  |
| T351             | 0.896674295 | CHCC-HBV  |
| DO45211          | 0.892884293 | LIRI-JP   |
| GSM363070        | 0.890998196 | GSE14520  |
| GSM363245        | 0.856499246 | GSE14520  |
| T385             | 0.851181961 | CHCC-HBV  |
| GSM1310586       | 0.847352146 | GSE54236  |
| TCGA.CC.A5UC.01A | 0.845382282 | TCGA-LIHC |
| TCGA.DD.AACP.01A | 0.838095021 | TCGA-LIHC |
| T661             | 0.834034738 | CHCC-HBV  |
| DO45127          | 0.828115909 | LIRI-JP   |
| T367             | 0.823788981 | CHCC-HBV  |
| GSM363297        | 0.8237801   | GSE14520  |
| T331             | 0.822594412 | CHCC-HBV  |
| GSM363150        | 0.813984197 | GSE14520  |
| GSM363354        | 0.809827725 | GSE14520  |
| DO45269          | 0.807479055 | LIRI-JP   |
| GSM363083        | 0.799667173 | GSE14520  |
| TCGA.5C.A9VG.01A | 0.791367163 | TCGA-LIHC |
| T671             | 0.791139476 | CHCC-HBV  |
| GSM363222        | 0.78201744  | GSE14520  |
| TCGA.CC.A7IE.01A | 0.780511254 | TCGA-LIHC |
| DO45145          | 0.780125992 | LIRI-JP   |
| GSM363127        | 0.775525014 | GSE14520  |
| TCGA.RG.A7D4.01A | 0.772324419 | TCGA-LIHC |
| TCGA.RC.A6M6.01A | 0.769179315 | TCGA-LIHC |
| TCGA.DD.AACL.01A | 0.767435807 | TCGA-LIHC |
| DO45259          | 0.766712119 | LIRI-JP   |
| T951             | 0.760807654 | CHCC-HBV  |
| TCGA.G3.AAV6.01A | 0.759316952 | TCGA-LIHC |
| DO45275          | 0.758876698 | LIRI-JP   |
| GSM363194        | 0.757552607 | GSE14520  |
| TCGA.DD.A39Y.01A | 0.757231125 | TCGA-LIHC |
| TCGA.2Y.A9GY.01A | 0.756870161 | TCGA-LIHC |
| TCGA.ED.A7PX.01A | 0.755323976 | TCGA-LIHC |

|                  |             |           |
|------------------|-------------|-----------|
| DO45299          | 0.753644104 | LIRI-JP   |
| DO50815          | 0.753453579 | LIRI-JP   |
| T983             | 0.753402183 | CHCC-HBV  |
| DO45161          | 0.75106566  | LIRI-JP   |
| DO23521          | 0.750054139 | LIRI-JP   |
| TCGA.DD.AA3A.01A | 0.749076209 | TCGA-LIHC |
| TCGA.CC.A1HT.01A | 0.747616498 | TCGA-LIHC |
| GSM363332        | 0.743249586 | GSE14520  |
| GSM363085        | 0.742718371 | GSE14520  |
| TCGA.CC.A3M9.01A | 0.742474592 | TCGA-LIHC |
| T211             | 0.741779131 | CHCC-HBV  |
| TCGA.CC.5258.01A | 0.740518183 | TCGA-LIHC |
| GSM363237        | 0.740072756 | GSE14520  |
| T391             | 0.739041363 | CHCC-HBV  |
| TCGA.FV.A4ZQ.01A | 0.738799586 | TCGA-LIHC |
| DO50799          | 0.736086049 | LIRI-JP   |
| DO45287          | 0.734848356 | LIRI-JP   |
| TCGA.CC.A8HT.01A | 0.734538262 | TCGA-LIHC |
| GSM363268        | 0.734456685 | GSE14520  |
| TCGA.DD.A1EL.01A | 0.732612844 | TCGA-LIHC |
| DO45307          | 0.728613458 | LIRI-JP   |
| DO23519          | 0.726775761 | LIRI-JP   |
| GSM363218        | 0.72532793  | GSE14520  |
| T877             | 0.724349676 | CHCC-HBV  |
| T387             | 0.723872138 | CHCC-HBV  |
| GSM363235        | 0.723757577 | GSE14520  |
| TCGA.DD.AAE0.01A | 0.722958191 | TCGA-LIHC |
| TCGA.DD.A1EJ.01A | 0.721854582 | TCGA-LIHC |
| TCGA.DD.AADC.01A | 0.721842499 | TCGA-LIHC |
| TCGA.DD.AACZ.01A | 0.721254335 | TCGA-LIHC |
| TCGA.DD.A4NN.01A | 0.721130849 | TCGA-LIHC |
| TCGA.BC.A112.01A | 0.719214014 | TCGA-LIHC |
| DO45093          | 0.719034069 | LIRI-JP   |
| DO45221          | 0.718664339 | LIRI-JP   |
| DO48730          | 0.718377173 | LIRI-JP   |
| GSM363263        | 0.718245605 | GSE14520  |
| TCGA.DD.AADB.01A | 0.717914064 | TCGA-LIHC |
| DO50778          | 0.717060169 | LIRI-JP   |
| GSM363147        | 0.715472271 | GSE14520  |
| DO23525          | 0.712695383 | LIRI-JP   |



|                  |             |           |
|------------------|-------------|-----------|
| TCGA.CC.A8HS.01A | 0.711695954 | TCGA-LIHC |
| GSM363309        | 0.711087584 | GSE14520  |
| T815             | 0.710877023 | CHCC-HBV  |
| T283             | 0.710795072 | CHCC-HBV  |
| T285             | 0.710046961 | CHCC-HBV  |
| TCGA.CC.A5UD.01A | 0.707424497 | TCGA-LIHC |
| TCGA.DD.AADN.01A | 0.707043541 | TCGA-LIHC |
| GSM363357        | 0.706850779 | GSE14520  |
| GSM363296        | 0.705984188 | GSE14520  |
| DO50806          | 0.705489458 | LIRI-JP   |
| TCGA.DD.AADD.01A | 0.704660265 | TCGA-LIHC |
| GSM363350        | 0.702883568 | GSE14520  |
| DO45193          | 0.702674673 | LIRI-JP   |
| GSM1310614       | 0.702265333 | GSE54236  |
| DO23515          | 0.700996717 | LIRI-JP   |
| GSM1310599       | 0.700393639 | GSE54236  |
| DO23526          | 0.699178075 | LIRI-JP   |
| DO48681          | 0.69875474  | LIRI-JP   |
| DO48757          | 0.698571879 | LIRI-JP   |
| DO45267          | 0.697897449 | LIRI-JP   |
| TCGA.BC.A69H.01A | 0.69755852  | TCGA-LIHC |
| GSM1310633       | 0.69509036  | GSE54236  |
| T537             | 0.694618877 | CHCC-HBV  |
| DO50785          | 0.694213195 | LIRI-JP   |
| DO45189          | 0.693353593 | LIRI-JP   |
| DO45303          | 0.692956711 | LIRI-JP   |
| DO23537          | 0.692626599 | LIRI-JP   |
| GSM1310576       | 0.689721111 | GSE54236  |
| T743             | 0.689492744 | CHCC-HBV  |
| GSM1310642       | 0.68655504  | GSE54236  |
| GSM363032        | 0.685444755 | GSE14520  |
| DO45305          | 0.685209293 | LIRI-JP   |
| T413             | 0.685146002 | CHCC-HBV  |
| TCGA.CC.A7IG.01A | 0.684938486 | TCGA-LIHC |
| DO45185          | 0.684611106 | LIRI-JP   |
| DO48697          | 0.683834309 | LIRI-JP   |
| T463             | 0.683738976 | CHCC-HBV  |
| TCGA.ZP.A9CZ.01A | 0.683128976 | TCGA-LIHC |
| TCGA.2Y.A9H0.01A | 0.682758066 | TCGA-LIHC |
| DO45209          | 0.682599668 | LIRI-JP   |

|                  |             |           |
|------------------|-------------|-----------|
| DO48751          | 0.682337356 | LIRI-JP   |
| T411             | 0.679265537 | CHCC-HBV  |
| TCGA.CC.A123.01A | 0.67921178  | TCGA-LIHC |
| GSM1310612       | 0.677421896 | GSE54236  |
| GSM363184        | 0.677132118 | GSE14520  |
| GSM363033        | 0.676340351 | GSE14520  |
| TCGA.DD.AADW.01A | 0.675585666 | TCGA-LIHC |
| TCGA.CC.5263.01A | 0.675025488 | TCGA-LIHC |
| GSM363030        | 0.675025382 | GSE14520  |
| GSM1310573       | 0.674764922 | GSE54236  |
| GSM363077        | 0.674408907 | GSE14520  |
| TCGA.CC.A3MB.01A | 0.673621532 | TCGA-LIHC |
| GSM363384        | 0.673241908 | GSE14520  |
| GSM1310603       | 0.672204962 | GSE54236  |
| T567             | 0.672093648 | CHCC-HBV  |
| GSM363386        | 0.671411077 | GSE14520  |
| TCGA.G3.A25T.01A | 0.671066335 | TCGA-LIHC |
| GSM363316        | 0.670674739 | GSE14520  |
| T343             | 0.670361883 | CHCC-HBV  |
| DO45265          | 0.670320301 | LIRI-JP   |
| TCGA.DD.A1EF.01A | 0.668146189 | TCGA-LIHC |
| TCGA.BC.A3KG.01A | 0.66810084  | TCGA-LIHC |
| GSM363011        | 0.667505473 | GSE14520  |
| TCGA.ED.A7PZ.01A | 0.667352197 | TCGA-LIHC |
| DO50829          | 0.665006082 | LIRI-JP   |
| GSM362983        | 0.664825805 | GSE14520  |
| GSM363330        | 0.66402478  | GSE14520  |
| T497             | 0.663719056 | CHCC-HBV  |
| TCGA.KR.A7K7.01A | 0.662839351 | TCGA-LIHC |
| TCGA.CC.A8HU.01A | 0.662170898 | TCGA-LIHC |
| TCGA.2Y.A9GS.01A | 0.662034899 | TCGA-LIHC |
| T724             | 0.660302937 | CHCC-HBV  |
| GSM363009        | 0.657835915 | GSE14520  |
| DO50791          | 0.657802467 | LIRI-JP   |
| TCGA.G3.A5SI.01A | 0.657246525 | TCGA-LIHC |
| TCGA.DD.AACB.01A | 0.657136506 | TCGA-LIHC |
| GSM1310591       | 0.656055552 | GSE54236  |
| GSM1310625       | 0.6552634   | GSE54236  |
| TCGA.WQ.A9G7.01A | 0.65525193  | TCGA-LIHC |
| GSM363204        | 0.654726503 | GSE14520  |

|                  |             |           |
|------------------|-------------|-----------|
| GSM363331        | 0.654259447 | GSE14520  |
| GSM363182        | 0.653327332 | GSE14520  |
| TCGA.DD.AACG.01A | 0.652875303 | TCGA-LIHC |
| T573             | 0.652477067 | CHCC-HBV  |
| DO48706          | 0.651114352 | LIRI-JP   |
| GSM363052        | 0.650533162 | GSE14520  |
| TCGA.UB.A7MA.01A | 0.649761612 | TCGA-LIHC |
| DO23508          | 0.649680468 | LIRI-JP   |
| TCGA.CC.A8HV.01A | 0.649272433 | TCGA-LIHC |
| TCGA.DD.AACW.01A | 0.649199819 | TCGA-LIHC |
| GSM1310596       | 0.647517379 | GSE54236  |
| GSM363037        | 0.647256373 | GSE14520  |
| DO45173          | 0.647173481 | LIRI-JP   |
| GSM363100        | 0.647130048 | GSE14520  |
| DO23545          | 0.646895523 | LIRI-JP   |
| GSM363166        | 0.646783869 | GSE14520  |
| TCGA.2Y.A9H7.01A | 0.646770954 | TCGA-LIHC |
| GSM363106        | 0.646469243 | GSE14520  |
| DO48682          | 0.645486955 | LIRI-JP   |
| GSM363249        | 0.645485412 | GSE14520  |
| GSM363151        | 0.64473201  | GSE14520  |
| DO45301          | 0.644377301 | LIRI-JP   |
| TCGA.ED.A8O6.01A | 0.644372209 | TCGA-LIHC |
| GSM363013        | 0.644193493 | GSE14520  |
| TCGA.CC.A7IK.01A | 0.644119804 | TCGA-LIHC |
| T355             | 0.64354555  | CHCC-HBV  |
| TCGA.CC.A5UE.01A | 0.643069917 | TCGA-LIHC |
| T227             | 0.642718756 | CHCC-HBV  |
| GSM363017        | 0.642431278 | GSE14520  |
| DO45187          | 0.642274603 | LIRI-JP   |
| T131             | 0.641561171 | CHCC-HBV  |
| DO48723          | 0.641045246 | LIRI-JP   |
| T1013            | 0.640530286 | CHCC-HBV  |
| GSM363190        | 0.639779521 | GSE14520  |
| TCGA.QA.A7B7.01A | 0.638930606 | TCGA-LIHC |
| TCGA.CC.A7IJ.01A | 0.638698975 | TCGA-LIHC |
| TCGA.CC.A9FW.01A | 0.637119187 | TCGA-LIHC |
| GSM363271        | 0.636932181 | GSE14520  |
| TCGA.DD.A1EG.01A | 0.636881785 | TCGA-LIHC |
| T277             | 0.636798144 | CHCC-HBV  |

|                  |             |           |
|------------------|-------------|-----------|
| DO48728          | 0.636787096 | LIRI-JP   |
| TCGA.G3.AAV5.01A | 0.635364535 | TCGA-LIHC |
| T313             | 0.635277415 | CHCC-HBV  |
| DO45205          | 0.634856    | LIRI-JP   |
| DO50809          | 0.634616887 | LIRI-JP   |
| GSM363348        | 0.634033412 | GSE14520  |
| DO45139          | 0.633593615 | LIRI-JP   |
| GSM363101        | 0.633534356 | GSE14520  |
| GSM363317        | 0.633286814 | GSE14520  |
| TCGA.MI.A75I.01A | 0.632835318 | TCGA-LIHC |
| GSM1310646       | 0.63230992  | GSE54236  |
| DO45245          | 0.63209655  | LIRI-JP   |
| TCGA.DD.AAD6.01A | 0.630544809 | TCGA-LIHC |
| TCGA.G3.A25Y.01A | 0.629826829 | TCGA-LIHC |
| DO48715          | 0.62927524  | LIRI-JP   |
| TCGA.DD.AAVU.01A | 0.628842801 | TCGA-LIHC |
| DO45117          | 0.62877997  | LIRI-JP   |
| TCGA.DD.AADR.01A | 0.628718099 | TCGA-LIHC |
| DO45277          | 0.627891465 | LIRI-JP   |
| GSM363049        | 0.627575638 | GSE14520  |
| GSM363079        | 0.626463835 | GSE14520  |
| TCGA.DD.AADO.01A | 0.626273958 | TCGA-LIHC |
| T375             | 0.625865054 | CHCC-HBV  |
| T525             | 0.625683962 | CHCC-HBV  |
| GSM1310650       | 0.625616297 | GSE54236  |
| T943             | 0.625538874 | CHCC-HBV  |
| TCGA.DD.A4NR.01A | 0.625343947 | TCGA-LIHC |
| TCGA.CC.5260.01A | 0.625159776 | TCGA-LIHC |
| GSM363339        | 0.624179103 | GSE14520  |
| GSM362993        | 0.623176189 | GSE14520  |
| T647             | 0.622201023 | CHCC-HBV  |
| TCGA.EP.A2KB.01A | 0.62203243  | TCGA-LIHC |
| TCGA.DD.AADF.01A | 0.621932877 | TCGA-LIHC |
| TCGA.G3.AAV7.01A | 0.621677835 | TCGA-LIHC |
| GSM363360        | 0.621574898 | GSE14520  |
| DO45239          | 0.621393529 | LIRI-JP   |
| TCGA.UB.A7ME.01A | 0.621245406 | TCGA-LIHC |
| GSM1310600       | 0.621216703 | GSE54236  |
| GSM1310648       | 0.621187527 | GSE54236  |
| T737             | 0.620300604 | CHCC-HBV  |

|                  |             |           |
|------------------|-------------|-----------|
| GSM363069        | 0.620137447 | GSE14520  |
| DO23552          | 0.618008368 | LIRI-JP   |
| TCGA.BC.A217.01A | 0.617755837 | TCGA-LIHC |
| GSM363145        | 0.617743338 | GSE14520  |
| GSM363274        | 0.616666482 | GSE14520  |
| DO48732          | 0.616067145 | LIRI-JP   |
| GSM1310584       | 0.615876469 | GSE54236  |
| TCGA.ZP.A9D2.01A | 0.615856738 | TCGA-LIHC |
| TCGA.ED.A66X.01A | 0.614645631 | TCGA-LIHC |
| DO45219          | 0.61407782  | LIRI-JP   |
| GSM363174        | 0.613951236 | GSE14520  |
| GSM363170        | 0.613870603 | GSE14520  |
| T161             | 0.61345366  | CHCC-HBV  |
| T1021            | 0.613317947 | CHCC-HBV  |
| TCGA.DD.AAVS.01A | 0.612931939 | TCGA-LIHC |
| TCGA.BC.A10Y.01A | 0.612778249 | TCGA-LIHC |
| TCGA.DD.AADV.01A | 0.612255191 | TCGA-LIHC |
| DO45217          | 0.612207813 | LIRI-JP   |
| GSM363211        | 0.611661891 | GSE14520  |
| TCGA.BC.A8YO.01A | 0.611096188 | TCGA-LIHC |
| GSM363146        | 0.610957752 | GSE14520  |
| GSM1310635       | 0.610923332 | GSE54236  |
| TCGA.DD.AAEI.01A | 0.610787179 | TCGA-LIHC |
| TCGA.DD.AACV.01A | 0.610576944 | TCGA-LIHC |
| TCGA.BC.A10W.01A | 0.610221032 | TCGA-LIHC |
| GSM362986        | 0.610190643 | GSE14520  |
| T493             | 0.609614595 | CHCC-HBV  |
| DO45297          | 0.609272513 | LIRI-JP   |
| GSM1310585       | 0.608901955 | GSE54236  |
| T357             | 0.608206066 | CHCC-HBV  |
| T427             | 0.608090289 | CHCC-HBV  |
| DO48737          | 0.607591616 | LIRI-JP   |
| TCGA.CC.A3MA.01A | 0.606198889 | TCGA-LIHC |
| TCGA.ED.A66Y.01A | 0.606158893 | TCGA-LIHC |
| GSM363298        | 0.606007201 | GSE14520  |
| TCGA.DD.AACH.01A | 0.604969755 | TCGA-LIHC |
| T967             | 0.604103223 | CHCC-HBV  |
| GSM363326        | 0.604019657 | GSE14520  |
| GSM363192        | 0.603960792 | GSE14520  |
| TCGA.DD.AADM.01A | 0.603727189 | TCGA-LIHC |

|                  |             |           |
|------------------|-------------|-----------|
| T257             | 0.603616946 | CHCC-HBV  |
| TCGA.DD.AAEE.01A | 0.603127894 | TCGA-LIHC |
| T491             | 0.602740007 | CHCC-HBV  |
| T883             | 0.602555152 | CHCC-HBV  |
| DO45225          | 0.602186591 | LIRI-JP   |
| T433             | 0.601775849 | CHCC-HBV  |
| DO45281          | 0.601624306 | LIRI-JP   |
| TCGA.2Y.A9H2.01A | 0.601613523 | TCGA-LIHC |
| T865             | 0.601220993 | CHCC-HBV  |
| TCGA.ED.A82E.01A | 0.600868967 | TCGA-LIHC |
| TCGA.EP.A2KA.01A | 0.600667167 | TCGA-LIHC |
| DO48747          | 0.600564553 | LIRI-JP   |
| DO45165          | 0.600057931 | LIRI-JP   |
| TCGA.K7.A5RG.01A | 0.599546462 | TCGA-LIHC |
| TCGA.CC.5264.01A | 0.59865403  | TCGA-LIHC |
| TCGA.UB.A7MF.01A | 0.5986135   | TCGA-LIHC |
| GSM1310643       | 0.598048104 | GSE54236  |
| TCGA.UB.A7MB.01A | 0.597780361 | TCGA-LIHC |
| T217             | 0.597666172 | CHCC-HBV  |
| TCGA.DD.A73F.01A | 0.59766132  | TCGA-LIHC |
| GSM363105        | 0.597386493 | GSE14520  |
| GSM363224        | 0.597131357 | GSE14520  |
| DO45237          | 0.596925237 | LIRI-JP   |
| DO45283          | 0.596436537 | LIRI-JP   |
| DO23524          | 0.596141724 | LIRI-JP   |
| TCGA.DD.AAC8.01A | 0.595858399 | TCGA-LIHC |
| GSM363056        | 0.595370726 | GSE14520  |
| GSM363329        | 0.595251008 | GSE14520  |
| GSM1310610       | 0.595077754 | GSE54236  |
| TCGA.RC.A7S9.01A | 0.594866013 | TCGA-LIHC |
| DO45183          | 0.594787603 | LIRI-JP   |
| GSM363311        | 0.594782879 | GSE14520  |
| GSM1310572       | 0.594766468 | GSE54236  |
| T953             | 0.594732866 | CHCC-HBV  |
| TCGA.UB.A7MC.01A | 0.594047671 | TCGA-LIHC |
| T545             | 0.593228259 | CHCC-HBV  |
| DO50840          | 0.592425613 | LIRI-JP   |
| TCGA.EP.A3RK.01A | 0.592287475 | TCGA-LIHC |
| GSM363232        | 0.592198285 | GSE14520  |
| GSM1310590       | 0.591570746 | GSE54236  |

|                  |             |           |
|------------------|-------------|-----------|
| GSM363048        | 0.591402652 | GSE14520  |
| TCGA.DD.A4NQ.01A | 0.59079452  | TCGA-LIHC |
| DO48741          | 0.590545722 | LIRI-JP   |
| TCGA.G3.A25S.01A | 0.590194643 | TCGA-LIHC |
| TCGA.DD.AAD5.01A | 0.589993146 | TCGA-LIHC |
| T473             | 0.589777289 | CHCC-HBV  |
| T571             | 0.589684122 | CHCC-HBV  |
| DO48717          | 0.589493656 | LIRI-JP   |
| TCGA.2Y.A9H8.01A | 0.589120726 | TCGA-LIHC |
| GSM363314        | 0.589071258 | GSE14520  |
| GSM363198        | 0.589050968 | GSE14520  |
| TCGA.DD.AAVQ.01A | 0.588356869 | TCGA-LIHC |
| TCGA.DD.AACF.01A | 0.588296044 | TCGA-LIHC |
| TCGA.EP.A3JL.01A | 0.588132571 | TCGA-LIHC |
| TCGA.BC.A10Q.01A | 0.587077821 | TCGA-LIHC |
| TCGA.DD.AAE6.01A | 0.5865189   | TCGA-LIHC |
| TCGA.DD.AACK.01A | 0.58645791  | TCGA-LIHC |
| DO45179          | 0.586357886 | LIRI-JP   |
| T363             | 0.586311914 | CHCC-HBV  |
| GSM363270        | 0.586256026 | GSE14520  |
| DO48720          | 0.586242086 | LIRI-JP   |
| TCGA.BW.A5NO.01A | 0.586084492 | TCGA-LIHC |
| TCGA.BC.4073.01B | 0.585044885 | TCGA-LIHC |
| TCGA.G3.A5SJ.01A | 0.584896323 | TCGA-LIHC |
| TCGA.WX.AA44.01A | 0.584565023 | TCGA-LIHC |
| T817             | 0.584479384 | CHCC-HBV  |
| GSM363292        | 0.584426663 | GSE14520  |
| GSM363080        | 0.584197428 | GSE14520  |
| T663             | 0.58417611  | CHCC-HBV  |
| GSM1310620       | 0.583708265 | GSE54236  |
| GSM363086        | 0.582843696 | GSE14520  |
| DO45169          | 0.582542245 | LIRI-JP   |
| TCGA.DD.A39Z.01A | 0.582481407 | TCGA-LIHC |
| GSM362982        | 0.582256632 | GSE14520  |
| T665             | 0.581906377 | CHCC-HBV  |
| DO45257          | 0.581905796 | LIRI-JP   |
| TCGA.FV.A3I1.01A | 0.581862218 | TCGA-LIHC |
| DO45235          | 0.581148634 | LIRI-JP   |
| TCGA.DD.AADL.01A | 0.580999611 | TCGA-LIHC |
| T435             | 0.580910287 | CHCC-HBV  |

|                  |             |           |
|------------------|-------------|-----------|
| TCGA.CC.5262.01A | 0.580472495 | TCGA-LIHC |
| GSM363072        | 0.580429358 | GSE14520  |
| DO45123          | 0.579720806 | LIRI-JP   |
| T517             | 0.579692122 | CHCC-HBV  |
| GSM1310601       | 0.579654743 | GSE54236  |
| TCGA.5C.AAPD.01A | 0.579440389 | TCGA-LIHC |
| DO45131          | 0.578027104 | LIRI-JP   |
| GSM363038        | 0.577960005 | GSE14520  |
| TCGA.DD.A113.01A | 0.577910931 | TCGA-LIHC |
| TCGA.2Y.A9HA.01A | 0.577831181 | TCGA-LIHC |
| DO23510          | 0.576719096 | LIRI-JP   |
| DO45213          | 0.576664446 | LIRI-JP   |
| TCGA.K7.AAU7.01A | 0.576636874 | TCGA-LIHC |
| TCGA.FV.A23B.01A | 0.576483688 | TCGA-LIHC |
| TCGA.DD.A4NE.01A | 0.575812192 | TCGA-LIHC |
| TCGA.2Y.A9H4.01A | 0.575449319 | TCGA-LIHC |
| TCGA.DD.A73B.01A | 0.575302497 | TCGA-LIHC |
| T917             | 0.575185668 | CHCC-HBV  |
| TCGA.G3.AAV1.01A | 0.57500162  | TCGA-LIHC |
| TCGA.PD.A5DF.01A | 0.574652795 | TCGA-LIHC |
| GSM363328        | 0.574462948 | GSE14520  |
| DO50802          | 0.574357984 | LIRI-JP   |
| TCGA.DD.AAEA.01A | 0.573895496 | TCGA-LIHC |
| TCGA.DD.AACX.01A | 0.573706619 | TCGA-LIHC |
| GSM363355        | 0.573555071 | GSE14520  |
| TCGA.G3.A25X.01A | 0.573529468 | TCGA-LIHC |
| TCGA.DD.A114.01A | 0.573411614 | TCGA-LIHC |
| T533             | 0.573408329 | CHCC-HBV  |
| GSM1310619       | 0.572641688 | GSE54236  |
| TCGA.RC.A7SH.01A | 0.572638149 | TCGA-LIHC |
| DO45199          | 0.571873068 | LIRI-JP   |
| DO50820          | 0.571218215 | LIRI-JP   |
| DO45119          | 0.570754918 | LIRI-JP   |
| GSM363400        | 0.570708702 | GSE14520  |
| TCGA.DD.AACJ.01A | 0.570546874 | TCGA-LIHC |
| DO50798          | 0.570477299 | LIRI-JP   |
| DO48679          | 0.569932064 | LIRI-JP   |
| TCGA.FV.A2QQ.01A | 0.569731406 | TCGA-LIHC |
| TCGA.DD.A3A3.01A | 0.569717816 | TCGA-LIHC |
| GSM363362        | 0.569608388 | GSE14520  |



|                  |             |           |
|------------------|-------------|-----------|
| GSM362992        | 0.56931101  | GSE14520  |
| TCGA.BC.A10Z.01A | 0.569244813 | TCGA-LIHC |
| T957             | 0.569125891 | CHCC-HBV  |
| TCGA.ED.A8O5.01A | 0.567951319 | TCGA-LIHC |
| DO45092          | 0.56725701  | LIRI-JP   |
| DO45247          | 0.567211321 | LIRI-JP   |
| DO23549          | 0.567164034 | LIRI-JP   |
| TCGA.DD.AADQ.01A | 0.567118322 | TCGA-LIHC |
| TCGA.DD.A3A7.01A | 0.56685262  | TCGA-LIHC |
| GSM363215        | 0.566425581 | GSE14520  |
| DO50825          | 0.566361073 | LIRI-JP   |
| GSM363149        | 0.565479296 | GSE14520  |
| TCGA.DD.AAVZ.01A | 0.564955958 | TCGA-LIHC |
| GSM363266        | 0.564939951 | GSE14520  |
| TCGA.WX.AA47.01A | 0.564627917 | TCGA-LIHC |
| TCGA.DD.AAE1.01A | 0.564513189 | TCGA-LIHC |
| GSM363341        | 0.564056367 | GSE14520  |
| TCGA.G3.A7M7.01A | 0.563841916 | TCGA-LIHC |
| GSM363310        | 0.563792107 | GSE14520  |
| TCGA.DD.A4NJ.01A | 0.563120521 | TCGA-LIHC |
| DO45155          | 0.56305779  | LIRI-JP   |
| GSM363251        | 0.562398796 | GSE14520  |
| DO45163          | 0.562323164 | LIRI-JP   |
| DO23542          | 0.561739221 | LIRI-JP   |
| DO45096          | 0.561419671 | LIRI-JP   |
| TCGA.DD.A39V.01A | 0.560808211 | TCGA-LIHC |
| DO23528          | 0.560499422 | LIRI-JP   |
| TCGA.BC.A216.01A | 0.56049403  | TCGA-LIHC |
| TCGA.YA.A8S7.01A | 0.56049296  | TCGA-LIHC |
| DO48736          | 0.560169194 | LIRI-JP   |
| TCGA.DD.AADJ.01A | 0.559694727 | TCGA-LIHC |
| TCGA.DD.AACA.01A | 0.559690037 | TCGA-LIHC |
| GSM363172        | 0.559174108 | GSE14520  |
| TCGA.DD.A1EH.01A | 0.558595675 | TCGA-LIHC |
| DO48712          | 0.558562063 | LIRI-JP   |
| TCGA.XR.A8TF.01A | 0.558246752 | TCGA-LIHC |
| DO45231          | 0.558191584 | LIRI-JP   |
| GSM362959        | 0.557958124 | GSE14520  |
| TCGA.CC.5259.01A | 0.557953205 | TCGA-LIHC |
| T135             | 0.55759227  | CHCC-HBV  |

|                  |             |           |
|------------------|-------------|-----------|
| GSM363152        | 0.557230797 | GSE14520  |
| T127             | 0.557034165 | CHCC-HBV  |
| DO23516          | 0.557001811 | LIRI-JP   |
| GSM362970        | 0.55685207  | GSE14520  |
| TCGA.XR.A8TC.01A | 0.556586554 | TCGA-LIHC |
| T123             | 0.556360404 | CHCC-HBV  |
| GSM1310622       | 0.555857274 | GSE54236  |
| T685             | 0.55531575  | CHCC-HBV  |
| GSM363078        | 0.555060939 | GSE14520  |
| TCGA.CC.A3MC.01A | 0.554839255 | TCGA-LIHC |
| TCGA.5C.A9VH.01A | 0.554718876 | TCGA-LIHC |
| T267             | 0.554167975 | CHCC-HBV  |
| GSM363036        | 0.553646018 | GSE14520  |
| TCGA.DD.A1EI.01A | 0.553296124 | TCGA-LIHC |
| TCGA.BD.A2L6.01A | 0.553263084 | TCGA-LIHC |
| GSM1310644       | 0.552785477 | GSE54236  |
| GSM1310639       | 0.551843548 | GSE54236  |
| TCGA.MI.A75C.01A | 0.55144391  | TCGA-LIHC |
| DO45263          | 0.551378399 | LIRI-JP   |
| GSM363209        | 0.550576015 | GSE14520  |
| DO45253          | 0.550539336 | LIRI-JP   |
| TCGA.G3.AAV3.01A | 0.550305785 | TCGA-LIHC |
| TCGA.ED.A7XP.01A | 0.550260134 | TCGA-LIHC |
| T467             | 0.549974449 | CHCC-HBV  |
| TCGA.DD.AACC.01A | 0.549631709 | TCGA-LIHC |
| DO50822          | 0.549381523 | LIRI-JP   |
| DO23533          | 0.54929294  | LIRI-JP   |
| TCGA.RC.A6M4.01A | 0.549027586 | TCGA-LIHC |
| DO50811          | 0.54871171  | LIRI-JP   |
| T425             | 0.548520755 | CHCC-HBV  |
| TCGA.CC.A9FS.01A | 0.548272524 | TCGA-LIHC |
| TCGA.DD.AADP.01A | 0.54803889  | TCGA-LIHC |
| DO48725          | 0.548010929 | LIRI-JP   |
| TCGA.DD.A73G.01A | 0.54796332  | TCGA-LIHC |
| DO50844          | 0.54735934  | LIRI-JP   |
| GSM363125        | 0.547205567 | GSE14520  |
| GSM363050        | 0.546798738 | GSE14520  |
| GSM1310574       | 0.546571715 | GSE54236  |
| TCGA.DD.AACS.01A | 0.546486776 | TCGA-LIHC |
| TCGA.EP.A2KC.01A | 0.545952117 | TCGA-LIHC |

|                  |             |           |
|------------------|-------------|-----------|
| TCGA.BC.A3KF.01A | 0.545927794 | TCGA-LIHC |
| GSM363247        | 0.545192249 | GSE14520  |
| GSM362958        | 0.545117308 | GSE14520  |
| TCGA.XR.A8TD.01A | 0.545112651 | TCGA-LIHC |
| DO45157          | 0.544994193 | LIRI-JP   |
| TCGA.G3.A25U.01A | 0.544739469 | TCGA-LIHC |
| DO23514          | 0.544590234 | LIRI-JP   |
| TCGA.DD.A3A1.01A | 0.544338414 | TCGA-LIHC |
| DO45091          | 0.544032382 | LIRI-JP   |
| TCGA.DD.AAD2.01A | 0.543956967 | TCGA-LIHC |
| DO45115          | 0.543842303 | LIRI-JP   |
| GSM363388        | 0.542506384 | GSE14520  |
| GSM1310611       | 0.542135248 | GSE54236  |
| TCGA.ED.A459.01A | 0.542053932 | TCGA-LIHC |
| TCGA.DD.A4NH.01A | 0.541748246 | TCGA-LIHC |
| TCGA.RC.A7SK.01A | 0.541368879 | TCGA-LIHC |
| GSM363031        | 0.54134128  | GSE14520  |
| DO48727          | 0.54107469  | LIRI-JP   |
| TCGA.DD.A73A.01A | 0.541064409 | TCGA-LIHC |
| GSM1310594       | 0.540696608 | GSE54236  |
| TCGA.RC.A7SF.01A | 0.540544221 | TCGA-LIHC |
| TCGA.DD.A3A9.01A | 0.54041731  | TCGA-LIHC |
| GSM1310624       | 0.540251391 | GSE54236  |
| TCGA.DD.A118.01A | 0.54022521  | TCGA-LIHC |
| TCGA.G3.A25Z.01A | 0.540086154 | TCGA-LIHC |
| TCGA.CC.5261.01A | 0.539610643 | TCGA-LIHC |
| GSM363123        | 0.539443974 | GSE14520  |
| TCGA.DD.AADI.01A | 0.539102952 | TCGA-LIHC |
| TCGA.DD.A73D.01A | 0.538692719 | TCGA-LIHC |
| TCGA.2Y.A9H9.01A | 0.538580388 | TCGA-LIHC |
| DO45289          | 0.538373247 | LIRI-JP   |
| TCGA.T1.A6J8.01A | 0.537923911 | TCGA-LIHC |
| DO50832          | 0.537916166 | LIRI-JP   |
| TCGA.BC.4072.01B | 0.537651241 | TCGA-LIHC |
| GSM1310627       | 0.537602257 | GSE54236  |
| TCGA.ED.A7XO.01A | 0.537094605 | TCGA-LIHC |
| DO48704          | 0.536270297 | LIRI-JP   |
| GSM363109        | 0.536014525 | GSE14520  |
| TCGA.DD.AAD0.01A | 0.535902422 | TCGA-LIHC |
| TCGA.CC.A7IF.01A | 0.535900305 | TCGA-LIHC |

|                  |             |           |
|------------------|-------------|-----------|
| DO23543          | 0.535817628 | LIRI-JP   |
| DO45121          | 0.534175949 | LIRI-JP   |
| T527             | 0.534080038 | CHCC-HBV  |
| GSM1310632       | 0.533859424 | GSE54236  |
| TCGA.RC.A7SB.01A | 0.53365944  | TCGA-LIHC |
| TCGA.BC.A5W4.01A | 0.533655061 | TCGA-LIHC |
| GSM363053        | 0.533515987 | GSE14520  |
| T553             | 0.533369904 | CHCC-HBV  |
| DO50804          | 0.533342606 | LIRI-JP   |
| GSM1310575       | 0.533199186 | GSE54236  |
| TCGA.DD.A3A5.01A | 0.533096572 | TCGA-LIHC |
| TCGA.DD.AAW3.01A | 0.53300387  | TCGA-LIHC |
| GSM363269        | 0.532630149 | GSE14520  |
| TCGA.G3.A7M6.01A | 0.53259992  | TCGA-LIHC |
| DO50819          | 0.532239267 | LIRI-JP   |
| TCGA.KR.A7K2.01A | 0.532199169 | TCGA-LIHC |
| TCGA.O8.A75V.01A | 0.53216355  | TCGA-LIHC |
| GSM363169        | 0.531135443 | GSE14520  |
| DO50859          | 0.531031691 | LIRI-JP   |
| GSM363289        | 0.53045961  | GSE14520  |
| TCGA.CC.A7IL.01A | 0.529773528 | TCGA-LIHC |
| GSM1310621       | 0.529423268 | GSE54236  |
| GSM1310570       | 0.528554742 | GSE54236  |
| DO23509          | 0.528529638 | LIRI-JP   |
| TCGA.FV.A496.01A | 0.528386324 | TCGA-LIHC |
| TCGA.2Y.A9H5.01A | 0.528022635 | TCGA-LIHC |
| T635             | 0.527603519 | CHCC-HBV  |
| T741             | 0.527509242 | CHCC-HBV  |
| TCGA.DD.AADK.01A | 0.526875015 | TCGA-LIHC |
| TCGA.DD.A4NG.01A | 0.526862008 | TCGA-LIHC |
| TCGA.BD.A3EP.01A | 0.526853305 | TCGA-LIHC |
| TCGA.DD.A4NA.01A | 0.526527732 | TCGA-LIHC |
| DO23539          | 0.526022222 | LIRI-JP   |
| T125             | 0.52599033  | CHCC-HBV  |
| T221             | 0.525714266 | CHCC-HBV  |
| TCGA.ED.A7PY.01A | 0.525589276 | TCGA-LIHC |
| TCGA.FV.A3I0.01A | 0.525357371 | TCGA-LIHC |
| TCGA.DD.A115.01A | 0.525300477 | TCGA-LIHC |
| TCGA.DD.A39X.01A | 0.525282163 | TCGA-LIHC |
| T727             | 0.525201369 | CHCC-HBV  |

|                  |             |           |
|------------------|-------------|-----------|
| TCGA.FV.A3R2.01A | 0.524962191 | TCGA-LIHC |
| GSM363148        | 0.524596372 | GSE14520  |
| GSM363207        | 0.524376883 | GSE14520  |
| TCGA.ED.A5KG.01A | 0.523730878 | TCGA-LIHC |
| TCGA.DD.AACD.01A | 0.523634062 | TCGA-LIHC |
| GSM1310580       | 0.522982221 | GSE54236  |
| TCGA.DD.A119.01A | 0.522614441 | TCGA-LIHC |
| TCGA.DD.A11C.01A | 0.522252854 | TCGA-LIHC |
| TCGA.DD.A11A.01A | 0.521921994 | TCGA-LIHC |
| DO48695          | 0.521722364 | LIRI-JP   |
| TCGA.UB.AA0U.01A | 0.521601638 | TCGA-LIHC |
| DO45143          | 0.521509719 | LIRI-JP   |
| TCGA.BC.A10T.01A | 0.52119395  | TCGA-LIHC |
| GSM363368        | 0.519540685 | GSE14520  |
| TCGA.DD.A39W.01A | 0.51946583  | TCGA-LIHC |
| DO23523          | 0.519336027 | LIRI-JP   |
| GSM363144        | 0.518694327 | GSE14520  |
| TCGA.BC.A10U.01A | 0.518215423 | TCGA-LIHC |
| DO45285          | 0.518131455 | LIRI-JP   |
| TCGA.2Y.A9GU.01A | 0.517944286 | TCGA-LIHC |
| T393             | 0.517295504 | CHCC-HBV  |
| TCGA.3K.AAZ8.01A | 0.51722707  | TCGA-LIHC |
| T431             | 0.516379196 | CHCC-HBV  |
| DO45175          | 0.516007603 | LIRI-JP   |
| TCGA.DD.AACA.02A | 0.515850829 | TCGA-LIHC |
| GSM363239        | 0.515776171 | GSE14520  |
| T1043            | 0.515733485 | CHCC-HBV  |
| GSM363230        | 0.515497763 | GSE14520  |
| DO45273          | 0.515307337 | LIRI-JP   |
| GSM1310588       | 0.514900334 | GSE54236  |
| TCGA.FV.A4ZP.01A | 0.514874623 | TCGA-LIHC |
| TCGA.ZS.A9CF.02A | 0.514797232 | TCGA-LIHC |
| DO45135          | 0.514739661 | LIRI-JP   |
| GSM1310647       | 0.513918068 | GSE54236  |
| TCGA.DD.AAE4.01A | 0.513685138 | TCGA-LIHC |
| GSM1310649       | 0.513386786 | GSE54236  |
| TCGA.DD.AACO.01A | 0.513110585 | TCGA-LIHC |
| DO50857          | 0.512550035 | LIRI-JP   |
| T1031            | 0.512469389 | CHCC-HBV  |
| GSM1310637       | 0.512455263 | GSE54236  |

|                  |             |           |
|------------------|-------------|-----------|
| GSM1310645       | 0.511822802 | GSE54236  |
| TCGA.DD.AAW2.01A | 0.511726418 | TCGA-LIHC |
| T487             | 0.511101844 | CHCC-HBV  |
| DO23550          | 0.51090154  | LIRI-JP   |
| TCGA.FV.A495.01A | 0.510871292 | TCGA-LIHC |
| T171             | 0.510832385 | CHCC-HBV  |
| T443             | 0.510604506 | CHCC-HBV  |
| GSM363241        | 0.510452141 | GSE14520  |
| GSM363057        | 0.509942019 | GSE14520  |
| GSM1310616       | 0.509845865 | GSE54236  |
| DO45137          | 0.509401313 | LIRI-JP   |
| T755             | 0.509333198 | CHCC-HBV  |
| DO50855          | 0.509175955 | LIRI-JP   |
| DO50850          | 0.508951567 | LIRI-JP   |
| GSM1310595       | 0.508428761 | GSE54236  |
| TCGA.DD.AAC9.01A | 0.508267033 | TCGA-LIHC |
| DO45255          | 0.508185766 | LIRI-JP   |
| T713             | 0.507216285 | CHCC-HBV  |
| TCGA.MI.A75G.01A | 0.50721347  | TCGA-LIHC |
| GSM363107        | 0.507186916 | GSE14520  |
| TCGA.GJ.A9DB.01A | 0.507097161 | TCGA-LIHC |
| TCGA.2Y.A9H1.01A | 0.507062506 | TCGA-LIHC |
| GSM363180        | 0.5069334   | GSE14520  |
| GSM363336        | 0.506871727 | GSE14520  |
| TCGA.DD.AAE9.01A | 0.506687641 | TCGA-LIHC |
| DO45099          | 0.506637746 | LIRI-JP   |
| GSM363075        | 0.506524898 | GSE14520  |
| T523             | 0.506461239 | CHCC-HBV  |
| T975             | 0.506005974 | CHCC-HBV  |
| GSM363265        | 0.505641062 | GSE14520  |
| DO45203          | 0.505460443 | LIRI-JP   |
| TCGA.DD.A1EC.01A | 0.50541343  | TCGA-LIHC |
| T141             | 0.504939835 | CHCC-HBV  |
| GSM1310608       | 0.504928661 | GSE54236  |
| GSM1310617       | 0.50488664  | GSE54236  |
| TCGA.MI.A75H.01A | 0.504788045 | TCGA-LIHC |
| GSM1310602       | 0.504642961 | GSE54236  |
| T1015            | 0.50460328  | CHCC-HBV  |
| DO48701          | 0.504524423 | LIRI-JP   |
| TCGA.GJ.A6C0.01A | 0.504460344 | TCGA-LIHC |

|                  |             |           |
|------------------|-------------|-----------|
| T361             | 0.504420832 | CHCC-HBV  |
| TCGA.DD.AACQ.01A | 0.50432613  | TCGA-LIHC |
| TCGA.DD.AACU.01A | 0.504173874 | TCGA-LIHC |
| GSM363178        | 0.503670409 | GSE14520  |
| T455             | 0.503497912 | CHCC-HBV  |
| DO50818          | 0.50345299  | LIRI-JP   |
| T311             | 0.503215586 | CHCC-HBV  |
| DO45113          | 0.502617864 | LIRI-JP   |
| GSM363346        | 0.502565598 | GSE14520  |
| TCGA.DD.AAE7.01A | 0.502553587 | TCGA-LIHC |
| TCGA.DD.AAD8.01A | 0.502506697 | TCGA-LIHC |
| TCGA.WQ.AB4B.01A | 0.502342584 | TCGA-LIHC |
| TCGA.EP.A26S.01A | 0.502029873 | TCGA-LIHC |
| GSM363082        | 0.50189495  | GSE14520  |
| DO23546          | 0.500902687 | LIRI-JP   |
| TCGA.MI.A75E.01A | 0.500643761 | TCGA-LIHC |
| T1025            | 0.500622971 | CHCC-HBV  |
| TCGA.ZP.A9D4.01A | 0.500561809 | TCGA-LIHC |
| GSM1310597       | 0.500515538 | GSE54236  |
| GSM363071        | 0.500045601 | GSE14520  |
| T923             | 0.499874936 | CHCC-HBV  |
| GSM1310623       | 0.499852126 | GSE54236  |
| GSM363337        | 0.499832607 | GSE14520  |
| DO45153          | 0.499824565 | LIRI-JP   |
| TCGA.G3.AAUZ.01A | 0.49979771  | TCGA-LIHC |
| TCGA.G3.A5SL.01A | 0.499712031 | TCGA-LIHC |
| DO50803          | 0.499344749 | LIRI-JP   |
| GSM363315        | 0.499197953 | GSE14520  |
| GSM363391        | 0.498653052 | GSE14520  |
| GSM363291        | 0.49858949  | GSE14520  |
| GSM1310609       | 0.498550275 | GSE54236  |
| DO45097          | 0.498433921 | LIRI-JP   |
| GSM1310605       | 0.498143044 | GSE54236  |
| TCGA.DD.A116.01A | 0.497699566 | TCGA-LIHC |
| GSM1310630       | 0.497364302 | GSE54236  |
| TCGA.2Y.A9GW.01A | 0.496852973 | TCGA-LIHC |
| TCGA.XR.A8TG.01A | 0.49598908  | TCGA-LIHC |
| T231             | 0.4955588   | CHCC-HBV  |
| TCGA.G3.AAV4.01A | 0.495447062 | TCGA-LIHC |
| TCGA.DD.A1EE.01A | 0.495206876 | TCGA-LIHC |

|                  |             |           |
|------------------|-------------|-----------|
| DO23541          | 0.495155019 | LIRI-JP   |
| DO45191          | 0.494113542 | LIRI-JP   |
| GSM1310593       | 0.49410094  | GSE54236  |
| DO23536          | 0.494046831 | LIRI-JP   |
| GSM363220        | 0.493656385 | GSE14520  |
| T113             | 0.493624498 | CHCC-HBV  |
| GSM363205        | 0.493517249 | GSE14520  |
| GSM362966        | 0.493422972 | GSE14520  |
| GSM363217        | 0.493158002 | GSE14520  |
| TCGA.DD.AAVV.01A | 0.49302644  | TCGA-LIHC |
| GSM1310592       | 0.492526242 | GSE54236  |
| DO50793          | 0.492424156 | LIRI-JP   |
| DO48761          | 0.492382991 | LIRI-JP   |
| DO48759          | 0.4920722   | LIRI-JP   |
| GSM363358        | 0.49192526  | GSE14520  |
| T483             | 0.491472465 | CHCC-HBV  |
| TCGA.BD.A3ER.01A | 0.491467252 | TCGA-LIHC |
| DO45227          | 0.4914639   | LIRI-JP   |
| DO50805          | 0.490535663 | LIRI-JP   |
| DO50807          | 0.490220241 | LIRI-JP   |
| TCGA.2Y.A9HB.01A | 0.490192554 | TCGA-LIHC |
| GSM363290        | 0.489917296 | GSE14520  |
| DO50776          | 0.489542939 | LIRI-JP   |
| DO50808          | 0.489069365 | LIRI-JP   |
| GSM363213        | 0.488070445 | GSE14520  |
| GSM363294        | 0.487837504 | GSE14520  |
| TCGA.DD.AAVY.01A | 0.487513335 | TCGA-LIHC |
| GSM1310589       | 0.487479851 | GSE54236  |
| TCGA.DD.A3A4.01A | 0.486983488 | TCGA-LIHC |
| TCGA.5R.AA1C.01A | 0.486980839 | TCGA-LIHC |
| T471             | 0.486588272 | CHCC-HBV  |
| GSM363202        | 0.486212032 | GSE14520  |
| T147             | 0.485466426 | CHCC-HBV  |
| TCGA.G3.AAV2.01A | 0.485187879 | TCGA-LIHC |
| DO50814          | 0.484652707 | LIRI-JP   |
| T112             | 0.484132194 | CHCC-HBV  |
| T187             | 0.483837693 | CHCC-HBV  |
| TCGA.G3.A3CK.01A | 0.483053593 | TCGA-LIHC |
| TCGA.DD.AAVR.01A | 0.48299733  | TCGA-LIHC |
| DO45171          | 0.482599015 | LIRI-JP   |



|                  |             |           |
|------------------|-------------|-----------|
| GSM363128        | 0.482474803 | GSE14520  |
| TCGA.G3.A5SM.01A | 0.482050041 | TCGA-LIHC |
| TCGA.DD.AACN.01A | 0.48183518  | TCGA-LIHC |
| GSM363376        | 0.481700441 | GSE14520  |
| GSM1310615       | 0.481524145 | GSE54236  |
| TCGA.DD.AACT.01A | 0.481227936 | TCGA-LIHC |
| TCGA.DD.AAVX.01A | 0.481212312 | TCGA-LIHC |
| DO48700          | 0.480343817 | LIRI-JP   |
| TCGA.4R.AA8I.01A | 0.479935973 | TCGA-LIHC |
| GSM712542        | 0.479539636 | GSE14520  |
| T383             | 0.479502421 | CHCC-HBV  |
| TCGA.GJ.A3OU.01A | 0.479030585 | TCGA-LIHC |
| TCGA.DD.AADY.01A | 0.478507142 | TCGA-LIHC |
| DO48716          | 0.478445654 | LIRI-JP   |
| TCGA.DD.AACY.01A | 0.478439097 | TCGA-LIHC |
| TCGA.DD.AAEH.01A | 0.478076512 | TCGA-LIHC |
| TCGA.K7.A6G5.01A | 0.477850818 | TCGA-LIHC |
| T271             | 0.477824561 | CHCC-HBV  |
| GSM1310571       | 0.477821312 | GSE54236  |
| GSM363015        | 0.477432995 | GSE14520  |
| DO23529          | 0.477255233 | LIRI-JP   |
| TCGA.DD.AAVP.01A | 0.477223888 | TCGA-LIHC |
| DO23518          | 0.477106045 | LIRI-JP   |
| DO48743          | 0.476670538 | LIRI-JP   |
| TCGA.ES.A2HS.01A | 0.476385438 | TCGA-LIHC |
| GSM1310606       | 0.476249352 | GSE54236  |
| GSM1310631       | 0.475376104 | GSE54236  |
| TCGA.DD.AADG.01A | 0.475133276 | TCGA-LIHC |
| GSM362987        | 0.474975394 | GSE14520  |
| TCGA.G3.A3CJ.01A | 0.474930874 | TCGA-LIHC |
| TCGA.G3.A7M5.01A | 0.474869499 | TCGA-LIHC |
| TCGA.2Y.A9H3.01A | 0.474730257 | TCGA-LIHC |
| GSM363343        | 0.473530546 | GSE14520  |
| GSM363313        | 0.473146434 | GSE14520  |
| DO45249          | 0.472423196 | LIRI-JP   |
| GSM1310613       | 0.472071012 | GSE54236  |
| T921             | 0.471864862 | CHCC-HBV  |
| TCGA.UB.A7MD.01A | 0.471859588 | TCGA-LIHC |
| TCGA.G3.A3CH.01A | 0.471666669 | TCGA-LIHC |
| GSM1310583       | 0.471658668 | GSE54236  |

|                  |             |           |
|------------------|-------------|-----------|
| TCGA.DD.AACI.01A | 0.471539966 | TCGA-LIHC |
| T851             | 0.471351183 | CHCC-HBV  |
| T223             | 0.470928335 | CHCC-HBV  |
| T477             | 0.469917655 | CHCC-HBV  |
| DO23540          | 0.469811234 | LIRI-JP   |
| TCGA.CC.A7IH.01A | 0.46953002  | TCGA-LIHC |
| GSM363164        | 0.469527557 | GSE14520  |
| GSM363115        | 0.469240255 | GSE14520  |
| GSM363333        | 0.469121631 | GSE14520  |
| DO50783          | 0.469061345 | LIRI-JP   |
| GSM362960        | 0.468950761 | GSE14520  |
| GSM1310604       | 0.468231916 | GSE54236  |
| T695             | 0.468184679 | CHCC-HBV  |
| T465             | 0.467523464 | CHCC-HBV  |
| DO45197          | 0.467376308 | LIRI-JP   |
| DO48672          | 0.467314935 | LIRI-JP   |
| TCGA.ZS.A9CE.01A | 0.467288829 | TCGA-LIHC |
| TCGA.DD.AACE.01A | 0.467224053 | TCGA-LIHC |
| DO50813          | 0.467007533 | LIRI-JP   |
| GSM1310636       | 0.466757899 | GSE54236  |
| TCGA.DD.AAE3.01A | 0.466270257 | TCGA-LIHC |
| GSM1310598       | 0.46599675  | GSE54236  |
| TCGA.DD.A1EA.01A | 0.465970774 | TCGA-LIHC |
| TCGA.KR.A7K8.01A | 0.46559267  | TCGA-LIHC |
| TCGA.FV.A2QR.01A | 0.464779793 | TCGA-LIHC |
| T557             | 0.464422917 | CHCC-HBV  |
| T913             | 0.464140926 | CHCC-HBV  |
| TCGA.DD.AADU.01A | 0.464122455 | TCGA-LIHC |
| GSM1310634       | 0.464064807 | GSE54236  |
| TCGA.ZS.A9CD.01A | 0.463770333 | TCGA-LIHC |
| TCGA.DD.AAE2.01A | 0.463598448 | TCGA-LIHC |
| GSM362965        | 0.463327019 | GSE14520  |
| TCGA.DD.AAEG.01A | 0.462468356 | TCGA-LIHC |
| DO48693          | 0.462377946 | LIRI-JP   |
| TCGA.G3.A7M8.01A | 0.462361066 | TCGA-LIHC |
| DO45243          | 0.462228226 | LIRI-JP   |
| DO23513          | 0.461283689 | LIRI-JP   |
| T341             | 0.461205794 | CHCC-HBV  |
| GSM363267        | 0.461060701 | GSE14520  |
| TCGA.DD.A4NO.01A | 0.460300427 | TCGA-LIHC |

|                  |             |           |
|------------------|-------------|-----------|
| T925             | 0.460268712 | CHCC-HBV  |
| GSM1310640       | 0.460092324 | GSE54236  |
| DO45095          | 0.460035111 | LIRI-JP   |
| TCGA.KR.A7K0.01A | 0.459962144 | TCGA-LIHC |
| TCGA.XR.A8TE.01A | 0.45958449  | TCGA-LIHC |
| TCGA.DD.A3A8.01A | 0.459125365 | TCGA-LIHC |
| DO45207          | 0.458565201 | LIRI-JP   |
| TCGA.NI.A4U2.01A | 0.458063002 | TCGA-LIHC |
| T641             | 0.457745974 | CHCC-HBV  |
| TCGA.DD.AAEK.01A | 0.457563508 | TCGA-LIHC |
| TCGA.DD.A73E.01A | 0.457219409 | TCGA-LIHC |
| GSM363014        | 0.456665934 | GSE14520  |
| TCGA.G3.AAV0.01A | 0.456519037 | TCGA-LIHC |
| TCGA.ZP.A9D0.01A | 0.456442113 | TCGA-LIHC |
| TCGA.LG.A6GG.01A | 0.455781024 | TCGA-LIHC |
| DO45251          | 0.455440501 | LIRI-JP   |
| GSM362988        | 0.454964072 | GSE14520  |
| DO227801         | 0.454716904 | LIRI-JP   |
| TCGA.G3.A3CG.01A | 0.454689205 | TCGA-LIHC |
| TCGA.MR.A520.01A | 0.454271963 | TCGA-LIHC |
| GSM1310638       | 0.454215373 | GSE54236  |
| TCGA.DD.AADA.01A | 0.453063026 | TCGA-LIHC |
| TCGA.2Y.A9H6.01A | 0.453038918 | TCGA-LIHC |
| GSM363130        | 0.452925508 | GSE14520  |
| TCGA.G3.A25V.01A | 0.452443411 | TCGA-LIHC |
| T745             | 0.452010439 | CHCC-HBV  |
| DO23535          | 0.452007751 | LIRI-JP   |
| TCGA.LG.A9QC.01A | 0.451653477 | TCGA-LIHC |
| TCGA.ZP.A9CV.01A | 0.451104093 | TCGA-LIHC |
| T823             | 0.451062409 | CHCC-HBV  |
| TCGA.BC.A10S.01A | 0.451059917 | TCGA-LIHC |
| GSM363371        | 0.450909946 | GSE14520  |
| TCGA.2Y.A9GZ.01A | 0.450760195 | TCGA-LIHC |
| GSM363352        | 0.450334787 | GSE14520  |
| T451             | 0.450107901 | CHCC-HBV  |
| TCGA.DD.A1EK.01A | 0.449776569 | TCGA-LIHC |
| TCGA.DD.AAED.01A | 0.449415355 | TCGA-LIHC |
| TCGA.DD.A3A2.01A | 0.447255377 | TCGA-LIHC |
| TCGA.ES.A2HT.01A | 0.446618743 | TCGA-LIHC |
| DO48677          | 0.446255788 | LIRI-JP   |

|                  |             |           |
|------------------|-------------|-----------|
| GSM363188        | 0.444936227 | GSE14520  |
| T977             | 0.444924864 | CHCC-HBV  |
| TCGA.DD.AAD1.01A | 0.444680317 | TCGA-LIHC |
| TCGA.LG.A9QD.01A | 0.444678288 | TCGA-LIHC |
| GSM363168        | 0.444346168 | GSE14520  |
| TCGA.WJ.A86L.01A | 0.444050406 | TCGA-LIHC |
| TCGA.MR.A8JO.01A | 0.4436944   | TCGA-LIHC |
| GSM363404        | 0.443681494 | GSE14520  |
| DO50789          | 0.442315241 | LIRI-JP   |
| DO45229          | 0.441516104 | LIRI-JP   |
| GSM363008        | 0.441316038 | GSE14520  |
| GSM363288        | 0.441088025 | GSE14520  |
| GSM1310587       | 0.440805    | GSE54236  |
| T813             | 0.440613819 | CHCC-HBV  |
| T445             | 0.439026835 | CHCC-HBV  |
| T1027            | 0.438975258 | CHCC-HBV  |
| DO48760          | 0.438933128 | LIRI-JP   |
| T873             | 0.438658113 | CHCC-HBV  |
| TCGA.DD.AAVW.01A | 0.437797504 | TCGA-LIHC |
| TCGA.ZS.A9CF.01A | 0.43736121  | TCGA-LIHC |
| T421             | 0.437306968 | CHCC-HBV  |
| GSM363029        | 0.437034505 | GSE14520  |
| DO45133          | 0.436066589 | LIRI-JP   |
| GSM1310628       | 0.435601257 | GSE54236  |
| T937             | 0.435475157 | CHCC-HBV  |
| T461             | 0.435221687 | CHCC-HBV  |
| T415             | 0.434524685 | CHCC-HBV  |
| TCGA.DD.A4ND.01A | 0.433026049 | TCGA-LIHC |
| DO23511          | 0.432870519 | LIRI-JP   |
| T715             | 0.432824757 | CHCC-HBV  |
| GSM363226        | 0.432529429 | GSE14520  |
| TCGA.BC.A10R.01A | 0.432162546 | TCGA-LIHC |
| TCGA.DD.AADS.01A | 0.431772016 | TCGA-LIHC |
| TCGA.G3.A3CI.01A | 0.431175444 | TCGA-LIHC |
| DO45223          | 0.431007821 | LIRI-JP   |
| T861             | 0.430636933 | CHCC-HBV  |
| GSM1310641       | 0.429429358 | GSE54236  |
| DO50787          | 0.429304738 | LIRI-JP   |
| GSM362964        | 0.429087189 | GSE14520  |
| GSM1310618       | 0.428727168 | GSE54236  |

|                  |             |           |
|------------------|-------------|-----------|
| DO45129          | 0.428501866 | LIRI-JP   |
| GSM1310607       | 0.428424452 | GSE145236 |
| TCGA.DD.A73C.01A | 0.428213391 | TCGA-LIHC |
| DO45103          | 0.428095735 | LIRI-JP   |
| GSM363034        | 0.427397196 | GSE14520  |
| TCGA.DD.AAD3.01A | 0.427079525 | TCGA-LIHC |
| GSM362978        | 0.427040245 | GSE14520  |
| GSM1310626       | 0.42680533  | GSE54236  |
| DO48721          | 0.426441275 | LIRI-JP   |
| T963             | 0.42484979  | CHCC-HBV  |
| GSM363196        | 0.424356824 | GSE14520  |
| TCGA.HP.A5MZ.01A | 0.423215632 | TCGA-LIHC |
| DO48742          | 0.422712586 | LIRI-JP   |
| TCGA.ZP.A9D1.01A | 0.422528147 | TCGA-LIHC |
| GSM363102        | 0.422321566 | GSE14520  |
| TCGA.BC.A69I.01A | 0.422182136 | TCGA-LIHC |
| GSM363344        | 0.420442781 | GSE14520  |
| DO23548          | 0.420257746 | LIRI-JP   |
| TCGA.ZP.A9CY.01A | 0.420170735 | TCGA-LIHC |
| GSM363108        | 0.420105691 | GSE14520  |
| DO48733          | 0.419816929 | LIRI-JP   |
| T365             | 0.418042063 | CHCC-HBV  |
| T881             | 0.417853988 | CHCC-HBV  |
| GSM363039        | 0.417003044 | GSE14520  |
| T195             | 0.416147851 | CHCC-HBV  |
| DO48719          | 0.41607737  | LIRI-JP   |
| DO48746          | 0.415681463 | LIRI-JP   |
| TCGA.DD.A11B.01A | 0.415009746 | TCGA-LIHC |
| T1045            | 0.414806874 | CHCC-HBV  |
| GSM363327        | 0.41436434  | GSE14520  |
| GSM363200        | 0.412423724 | GSE14520  |
| DO45105          | 0.412265188 | LIRI-JP   |
| DO23538          | 0.4119677   | LIRI-JP   |
| DO23547          | 0.411883185 | LIRI-JP   |
| DO45159          | 0.410823133 | LIRI-JP   |
| DO45177          | 0.410762835 | LIRI-JP   |
| T145             | 0.410074644 | CHCC-HBV  |
| TCGA.DD.AAW1.01A | 0.409768497 | TCGA-LIHC |
| DO227643         | 0.409487599 | LIRI-JP   |
| GSM363272        | 0.409274379 | GSE14520  |

|                  |             |           |
|------------------|-------------|-----------|
| TCGA.DD.AAW0.01A | 0.40792445  | TCGA-LIHC |
| DO45261          | 0.407759656 | LIRI-JP   |
| GSM363293        | 0.406065477 | GSE14520  |
| TCGA.DD.A1EB.01A | 0.405750712 | TCGA-LIHC |
| T1041            | 0.405322744 | CHCC-HBV  |
| TCGA.DD.AAEB.01A | 0.405261997 | TCGA-LIHC |
| DO23527          | 0.40337034  | LIRI-JP   |
| TCGA.DD.A4NI.01A | 0.402465297 | TCGA-LIHC |
| T563             | 0.40224311  | CHCC-HBV  |
| TCGA.ED.A4XI.01A | 0.399617632 | TCGA-LIHC |
| GSM362994        | 0.399270937 | GSE14520  |
| T615             | 0.398516345 | CHCC-HBV  |
| DO45094          | 0.397219741 | LIRI-JP   |
| DO45141          | 0.396753439 | LIRI-JP   |
| DO50774          | 0.396717151 | LIRI-JP   |
| DO45149          | 0.396529018 | LIRI-JP   |
| DO45195          | 0.39616035  | LIRI-JP   |
| T777             | 0.396084502 | CHCC-HBV  |
| GSM363264        | 0.395995428 | GSE14520  |
| DO45233          | 0.395285793 | LIRI-JP   |
| GSM363084        | 0.394647544 | GSE14520  |
| TCGA.EP.A12J.01A | 0.394478328 | TCGA-LIHC |
| DO23512          | 0.393724723 | LIRI-JP   |
| TCGA.DD.A4NP.01A | 0.393450056 | TCGA-LIHC |
| T515             | 0.392857993 | CHCC-HBV  |
| DO45201          | 0.392434872 | LIRI-JP   |
| GSM363126        | 0.392024775 | GSE14520  |
| TCGA.NI.A8LF.01A | 0.391743638 | TCGA-LIHC |
| DO45241          | 0.391023809 | LIRI-JP   |
| T423             | 0.3881157   | CHCC-HBV  |
| TCGA.WX.AA46.01A | 0.387663979 | TCGA-LIHC |
| DO50839          | 0.387494635 | LIRI-JP   |
| GSM363012        | 0.386956067 | GSE14520  |
| TCGA.UB.AA0V.01A | 0.386394287 | TCGA-LIHC |
| TCGA.DD.A11D.01A | 0.385783791 | TCGA-LIHC |
| TCGA.5R.AAAM.01A | 0.385025511 | TCGA-LIHC |
| T513             | 0.383969046 | CHCC-HBV  |
| TCGA.G3.A6UC.01A | 0.383775193 | TCGA-LIHC |
| TCGA.DD.A4NK.01A | 0.38279019  | TCGA-LIHC |
| DO45181          | 0.380633543 | LIRI-JP   |

|                  |             |           |
|------------------|-------------|-----------|
| GSM363081        | 0.380242919 | GSE14520  |
| TCGA.DD.A4NF.01A | 0.379668955 | TCGA-LIHC |
| T395             | 0.379197193 | CHCC-HBV  |
| DO48674          | 0.378679854 | LIRI-JP   |
| GSM363366        | 0.378548096 | GSE14520  |
| TCGA.2Y.A9GX.01A | 0.376313623 | TCGA-LIHC |
| TCGA.ZS.A9CG.01A | 0.376177225 | TCGA-LIHC |
| T617             | 0.374790641 | CHCC-HBV  |
| TCGA.ED.A97K.01A | 0.374263987 | TCGA-LIHC |
| GSM363054        | 0.370612593 | GSE14520  |
| T137             | 0.369733444 | CHCC-HBV  |
| TCGA.RC.A6M5.01A | 0.369553203 | TCGA-LIHC |
| GSM363312        | 0.36939872  | GSE14520  |
| T785             | 0.369103751 | CHCC-HBV  |
| DO23517          | 0.367014473 | LIRI-JP   |
| GSM363104        | 0.365118588 | GSE14520  |
| DO50800          | 0.362764039 | LIRI-JP   |
| DO50816          | 0.362636856 | LIRI-JP   |
| DO45125          | 0.362315855 | LIRI-JP   |
| GSM363273        | 0.361027013 | GSE14520  |
| GSM362972        | 0.358637899 | GSE14520  |
| TCGA.DD.A4NL.01A | 0.358027874 | TCGA-LIHC |
| TCGA.2Y.A9GV.01A | 0.35774233  | TCGA-LIHC |
| T863             | 0.357526387 | CHCC-HBV  |
| T911             | 0.354815933 | CHCC-HBV  |
| TCGA.2Y.A9GT.01A | 0.353070659 | TCGA-LIHC |
| TCGA.BC.A10X.01A | 0.349699281 | TCGA-LIHC |
| DO23531          | 0.349102222 | LIRI-JP   |
| T261             | 0.348267196 | CHCC-HBV  |
| TCGA.FV.A3R3.01A | 0.34812573  | TCGA-LIHC |
| T353             | 0.34807199  | CHCC-HBV  |
| GSM363087        | 0.347924811 | GSE14520  |
| GSM1310578       | 0.347894045 | GSE54236  |
| T327             | 0.345653278 | CHCC-HBV  |
| TCGA.DD.A4NV.01A | 0.345154613 | TCGA-LIHC |
| TCGA.HP.A5N0.01A | 0.344455886 | TCGA-LIHC |
| GSM363016        | 0.343937155 | GSE14520  |
| DO45111          | 0.343893689 | LIRI-JP   |
| T627             | 0.343552392 | CHCC-HBV  |
| DO23544          | 0.342074128 | LIRI-JP   |

|                  |             |           |
|------------------|-------------|-----------|
| TCGA.BC.A110.01A | 0.341714879 | TCGA-LIHC |
| GSM363074        | 0.341312669 | GSE14520  |
| GSM363335        | 0.341086257 | GSE14520  |
| DO23534          | 0.341060702 | LIRI-JP   |
| TCGA.ED.A627.01A | 0.340087852 | TCGA-LIHC |
| TCGA.5R.AA1D.01A | 0.339651893 | TCGA-LIHC |
| GSM1310581       | 0.338327255 | GSE54236  |
| DO45279          | 0.337028358 | LIRI-JP   |
| GSM363176        | 0.336959042 | GSE14520  |
| DO23530          | 0.336158558 | LIRI-JP   |
| GSM363124        | 0.333265961 | GSE14520  |
| T867             | 0.333097039 | CHCC-HBV  |
| DO45167          | 0.331709788 | LIRI-JP   |
| GSM363099        | 0.331152402 | GSE14520  |
| DO45109          | 0.330850144 | LIRI-JP   |
| GSM363142        | 0.329003609 | GSE14520  |
| GSM1310582       | 0.32883125  | GSE54236  |
| T915             | 0.328829044 | CHCC-HBV  |
| TCGA.G3.A5SK.01A | 0.328657082 | TCGA-LIHC |
| DO50817          | 0.328462806 | LIRI-JP   |
| T481             | 0.327456509 | CHCC-HBV  |
| GSM363364        | 0.325799626 | GSE14520  |
| DO45101          | 0.325655674 | LIRI-JP   |
| GSM362976        | 0.325020396 | GSE14520  |
| GSM363295        | 0.32494396  | GSE14520  |
| DO50845          | 0.323560985 | LIRI-JP   |
| GSM363121        | 0.32259432  | GSE14520  |
| DO45107          | 0.32223099  | LIRI-JP   |
| GSM362984        | 0.320883677 | GSE14520  |
| TCGA.DD.A4NB.01A | 0.319338534 | TCGA-LIHC |
| GSM363186        | 0.318781467 | GSE14520  |
| TCGA.K7.A5RF.01A | 0.318342364 | TCGA-LIHC |
| T955             | 0.315598974 | CHCC-HBV  |
| TCGA.DD.A1ED.01A | 0.313861651 | TCGA-LIHC |
| DO23551          | 0.313630083 | LIRI-JP   |
| T191             | 0.311925892 | CHCC-HBV  |
| DO45215          | 0.308580704 | LIRI-JP   |
| GSM363055        | 0.304845609 | GSE14520  |
| T981             | 0.304701056 | CHCC-HBV  |
| TCGA.DD.A4NS.01A | 0.301903014 | TCGA-LIHC |



|                  |             |           |
|------------------|-------------|-----------|
| T857             | 0.300210578 | CHCC-HBV  |
| GSM363010        | 0.278412038 | GSE14520  |
| GSM363378        | 0.269455066 | GSE14520  |
| GSM362977        | 0.268221341 | GSE14520  |
| GSM1310577       | 0.268006547 | GSE54236  |
| GSM363035        | 0.263813743 | GSE14520  |
| TCGA.DD.A3A6.01A | 0.263610893 | TCGA-LIHC |
| GSM363243        | 0.259939581 | GSE14520  |
| GSM363051        | 0.232938639 | GSE14520  |
| GSM363098        | 0.220697442 | GSE14520  |
| GSM363275        | 0.21999747  | GSE14520  |
| GSM363393        | 0.218179727 | GSE14520  |
| GSM362971        | 0.199558683 | GSE14520  |
| T721             | 0.19940148  | CHCC-HBV  |
| GSM363073        | 0.198429789 | GSE14520  |
| GSM1310629       | 0.197018103 | GSE54236  |
| GSM363122        | 0.186528516 | GSE14520  |
| DO23532          | 0.177896555 | LIRI-JP   |
| GSM363143        | 0.170065957 | GSE14520  |
| GSM1310579       | 0.055940101 | GSE54236  |
| GSM363076        | 0           | GSE14520  |

---

Table S3. Thirteen HSRM hub genes selected by LASSO regression models.

| Gene<br>Symbol | HSRM<br>coefficient | HR <sup>a</sup> | HR.95L <sup>a</sup> | HR.95H <sup>a</sup> | P-value <sup>a</sup> |
|----------------|---------------------|-----------------|---------------------|---------------------|----------------------|
| KPNA2          | -0.0426             | 1.758           | 1.454               | 2.125               | 5.692E-09            |
| UCK2           | 0.1762              | 1.960           | 1.553               | 2.475               | 1.469E-08            |
| PPM1G          | -0.0460             | 2.462           | 1.789               | 3.390               | 3.295E-08            |
| YBX1           | 0.2481              | 2.101           | 1.650               | 2.674               | 1.657E-09            |
| G6PD           | -0.0491             | 1.455           | 1.289               | 1.641               | 1.247E-09            |
| NOL10          | 0.3045              | 3.021           | 2.009               | 4.544               | 1.104E-07            |
| DYNC1LI1       | 0.3166              | 2.638           | 1.907               | 3.649               | 4.593E-09            |
| NEIL3          | 0.1102              | 1.613           | 1.367               | 1.904               | 1.570E-08            |
| PTDSS2         | 0.2484              | 1.661           | 1.320               | 2.090               | 1.483E-05            |
| SEPHS1         | 0.2446              | 2.513           | 1.815               | 3.479               | 2.813E-08            |
| SMS            | -0.0027             | 1.955           | 1.543               | 2.476               | 2.724E-08            |
| MED8           | 0.1280              | 2.664           | 1.867               | 3.802               | 6.702E-08            |
| RAMP3          | -0.1211             | 0.674           | 0.573               | 0.793               | 2.124E-06            |

Abbreviations: HR, hazard ratio;

<sup>a</sup> The hazard ratio and p-value of univariate Cox proportional hazards regression analysis shown by forest plot (Figure 5D).

Table S4. Topoisomerase inhibitors, CDK inhibitors and HDAC inhibitors that predicted to transcriptionally inhibit cancer stemness of HCC.

| Score <sup>a</sup>      | Name              | Target                                                      | PMID <sup>b</sup> |
|-------------------------|-------------------|-------------------------------------------------------------|-------------------|
| Topoisomerase inhibitor |                   |                                                             |                   |
| -98.77                  | camptothecin      | TOP1, HIF1A                                                 | 28910823          |
| -98.59                  | amonafide         | TOP2A, TOP2B                                                | 32328475          |
| -98.24                  | topotecan         | TOP1, TOP1MT                                                | 12872448          |
| -98.24                  | pidorubicine      | TOP2A                                                       | 8070007           |
| -98.17                  | daunorubicin      | TOP2A, TOP2B                                                | 10810429          |
| -98.06                  | SN-38             | TOP1                                                        | 29031818          |
| -97.96                  | idarubicin        | TOP2A                                                       | 24738629          |
| -97.85                  | doxorubicin       | TOP2A                                                       | 12419750          |
| -97.78                  | mitoxantrone      | TOP2A, PIM1                                                 | 1315428           |
| -97.74                  | pirarubicin       | TOP2A                                                       | 30588188          |
| -97.15                  | teniposide        | TOP2A, CYP3A5                                               | 3039431           |
| -97.08                  | irinotecan        | TOP1, CYP3A5, TOP1MT                                        | 16427779          |
| -96.58                  | celastrol         | IL1B, TNF                                                   | 25657108          |
| -95.03                  | amsacrine         | TOP2A, KCNH2                                                | 6286120           |
| CDK inhibitor           |                   |                                                             |                   |
| -99.61                  | aminopurvalanol-a | CDK1, CDK2, CDK5, CDK6                                      | -                 |
| -99.51                  | palbociclib       | CDK4, CDK6, CCND3                                           | 27849562          |
| -99.16                  | purvalanol-a      | CDK1, CDK2, CDK4, CDK5, CCND1, CCNE1, CSNK1G3, RPS6KA1, SRC | -                 |
| -98.52                  | CGP-60474         | CDK1, CDK2                                                  | -                 |
| -98.38                  | JNJ-7706621       | CDK1, CDK2, AURKA, AURKB                                    | -                 |

|                |                        |                                                                                                    |          |
|----------------|------------------------|----------------------------------------------------------------------------------------------------|----------|
| -98.34         | AT-7519                | CDK2, CDK5, CDK1, CDK4, CDK6, CDK9                                                                 | 31378681 |
| -98.31         | alvocidib              | CDK2, CDK4, CDK1, CDK6, CDK7, CDK9, CDK5, CDK8, EGFR, PYGM, BCL2, BIRC5, CCNT1, MCL1, XIAP         | 16820931 |
| -98.27         | PHA-793887             | CDK1, CDK2, CDK4, CDK5, CCND1, CCNE1, CDK7, CDK9                                                   | -        |
| -98.27         | bisindolylmaleimide-ix | SIRT1, AKT1, GSK3B, LCK, LRRK2, MAPK1, MAPK11, MAPK12, MAPK14, MAPK8, PRKCA, ROCK1, RPS6KB1, SIRT2 | -        |
| -98.24         | roscovitine            | CDK2, CDK9, CDK7, CDK1, CDK5                                                                       | 21994207 |
| HDAC inhibitor |                        |                                                                                                    |          |
| -98.56         | scriptaid              | HDAC1, HDAC2, HDAC3, HDAC4, HDAC5, HDAC6, HDAC7, HDAC8, HDAC9                                      | 29945926 |
| -98.36         | NCH-51                 | HDAC1, HDAC10, HDAC11, HDAC2, HDAC3, HDAC4, HDAC5, HDAC6, HDAC7, HDAC8, HDAC9                      | -        |
| -97.56         | HC-toxin               | HDAC1                                                                                              | 34282273 |
| -97.15         | mocetinostat           | HDAC1, HDAC2, HDAC3, HDAC11                                                                        | 32194803 |
| -96.79         | panobinostat           | HDAC1, HDAC2, HDAC3, HDAC4, HDAC6, HDAC7, HDAC8, HDAC9                                             | 22322234 |
| -96.48         | ISOX                   | HDAC6                                                                                              | -        |
| -96.16         | apicidin               | HDAC1, HDAC10, HDAC11, HDAC2, HDAC3, HDAC4, HDAC5, HDAC6, HDAC7, HDAC8, HDAC9                      | 19376607 |
| -95.7          | vorinostat             | HDAC1, HDAC2, HDAC3, HDAC6, HDAC8, HDAC10, HDAC11, HDAC5, HDAC9                                    | 31305287 |
| -95.24         | THM-I-94               | HDAC1, HDAC10, HDAC2, HDAC3, HDAC6, HDAC8                                                          | -        |
| -95.08         | WT-171                 | HDAC6                                                                                              | -        |

<sup>a</sup> The result of CMap query;

<sup>b</sup> Experimental and clinical evidence of these compounds were searched in Pubmed.

## Reference

1. Mlecnik, B., et al., *Histopathologic-based prognostic factors of colorectal cancers are associated with the state of the local immune reaction*. J Clin Oncol, 2011. **29**(6): p. 610–8.
2. Newman, A.M., et al., *Robust enumeration of cell subsets from tissue expression profiles*. Nat Methods, 2015. **12**(5): p. 453–7.
3. Bagaev, A., et al., *Conserved pan-cancer microenvironment subtypes predict response to immunotherapy*. Cancer Cell, 2021. **39**(6): p. 845–865 e7.
